# Supplementary material for: NiCoP–CeO2 composites for efficient electrochemical oxygen evolution
Source: Royal Society of Chemistry journal article supplement (doi:10.1039/d2ra00968d), 2022-01-01
Supplement: d2ra00968d1.pdf [file d2ra00968d1.pdf]

## Electronic Supplementary Information

### **NiCoP-CeO<sub>2</sub> Composites for Efficient Electrochemical Oxygen Evolution**

Jiyu Li,<sup>a</sup> Zeyan Wang,<sup>\*a</sup> Peng Wang,<sup>a</sup> Zhaoke Zheng,<sup>a</sup> Yuanyuan Liu,<sup>a</sup> Hefeng Cheng,<sup>a</sup> and Baibiao Huang<sup>\*a</sup>

*a State Key Laboratory of Crystal Materials, Shandong University, Jinan 250100, China.*

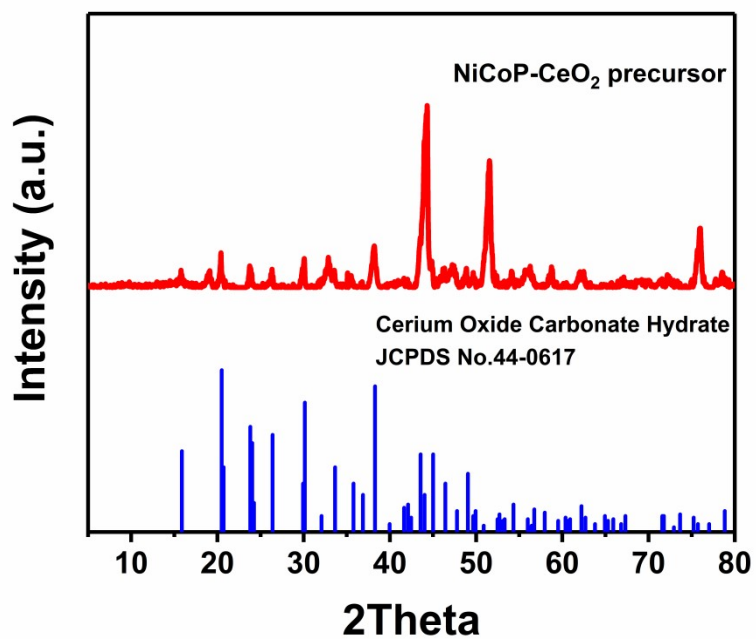

Fig. S1 XRD patterns of NiCoP-CeO<sub>2</sub> precursors.

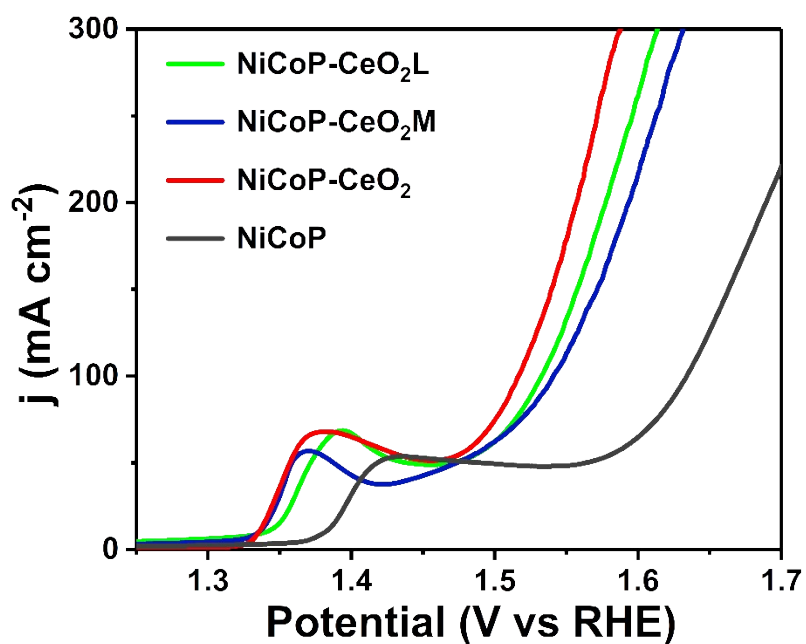

Fig. S2 LSV curves of NiCoP-CeO<sub>2</sub> electrodes with different amount loading on NiCoP in 1M KOH solution.

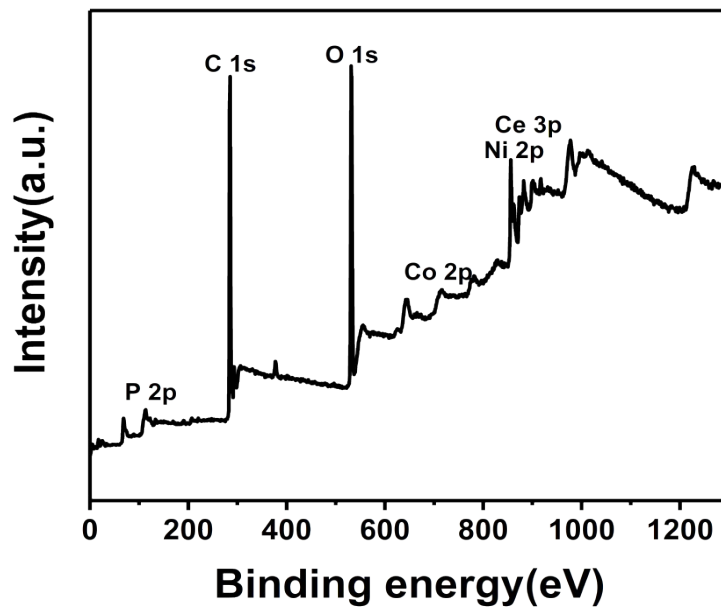

**Fig. S3** XPS survey spectra of NiCoP-CeO<sub>2</sub>.

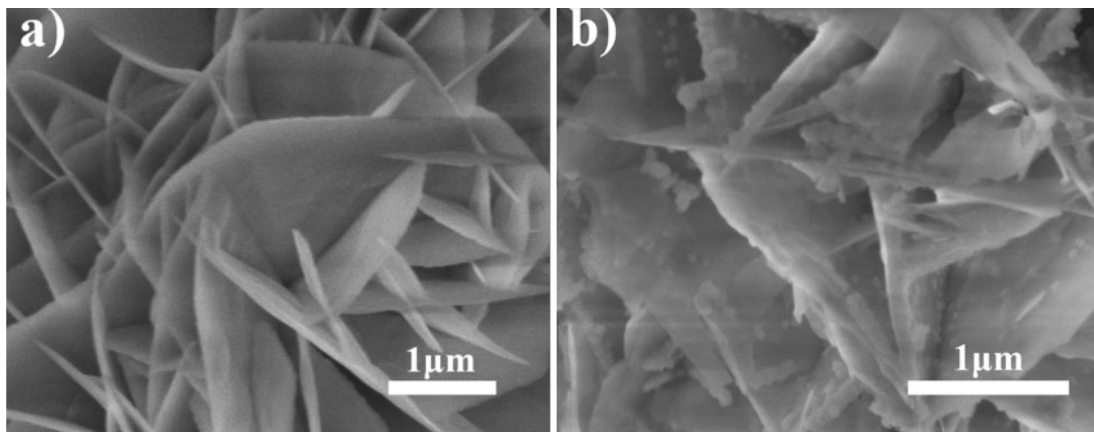

**Fig. S4** SEM images of NiCo-LDHs (a) and NiCoP-CeO<sub>2</sub> precursors (b).

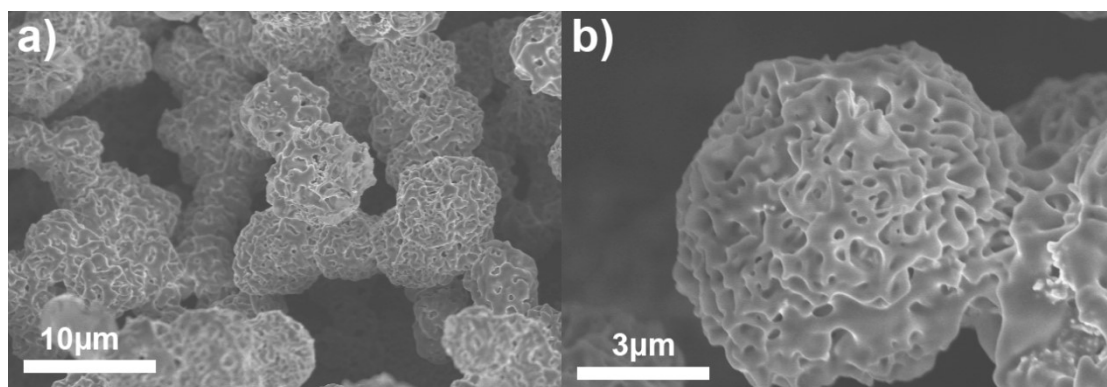

**Fig. S5** SEM images of low (a) and high (b) magnification of NiCoP.

**Table S1** Summary of electrocatalytic OER activities of LDHs-CeO<sub>2</sub> composites electrocatalysts<sup>a</sup>

| Catalyst                                                 | Overpotential (mV) | Tafel slope (mV dec <sup>-1</sup> ) | References       |
|----------------------------------------------------------|--------------------|-------------------------------------|------------------|
| NiFe-LDH/CeO <sub>2</sub> @CeNC                          | 235                | 128.8                               | 1                |
| CeO <sub>2</sub> /NiFe-LDH                               | 243                | 65                                  | 2                |
| CeO <sub>2-x</sub> @CoFe LDH                             | 204 <sup>b</sup>   | 23.7                                | 3                |
| CeO <sub>2</sub> -FeCo LDH                               | 260                | 40                                  | 4                |
| ceria/Ni-TMO                                             | 350                | 38                                  | 5                |
| NF@NiFe LDH/CeO <sub>x</sub>                             | 280 <sup>c</sup>   | --                                  | 6                |
| Ni <sub>80</sub> Fe <sub>20</sub> /50wt%CeO <sub>2</sub> | 289                | 40                                  | 7                |
| <b>NiCoP-CeO<sub>2</sub></b>                             | <b>217</b>         | <b>45</b>                           | <b>this work</b> |

[a] except for special instructions, the value of catalyst overpotential in the table is at 10 mA cm<sup>-2</sup> of current density; [b]: the overpotential at 100mA cm<sup>-2</sup> of current density; [c] the overpotential of overall water splitting.

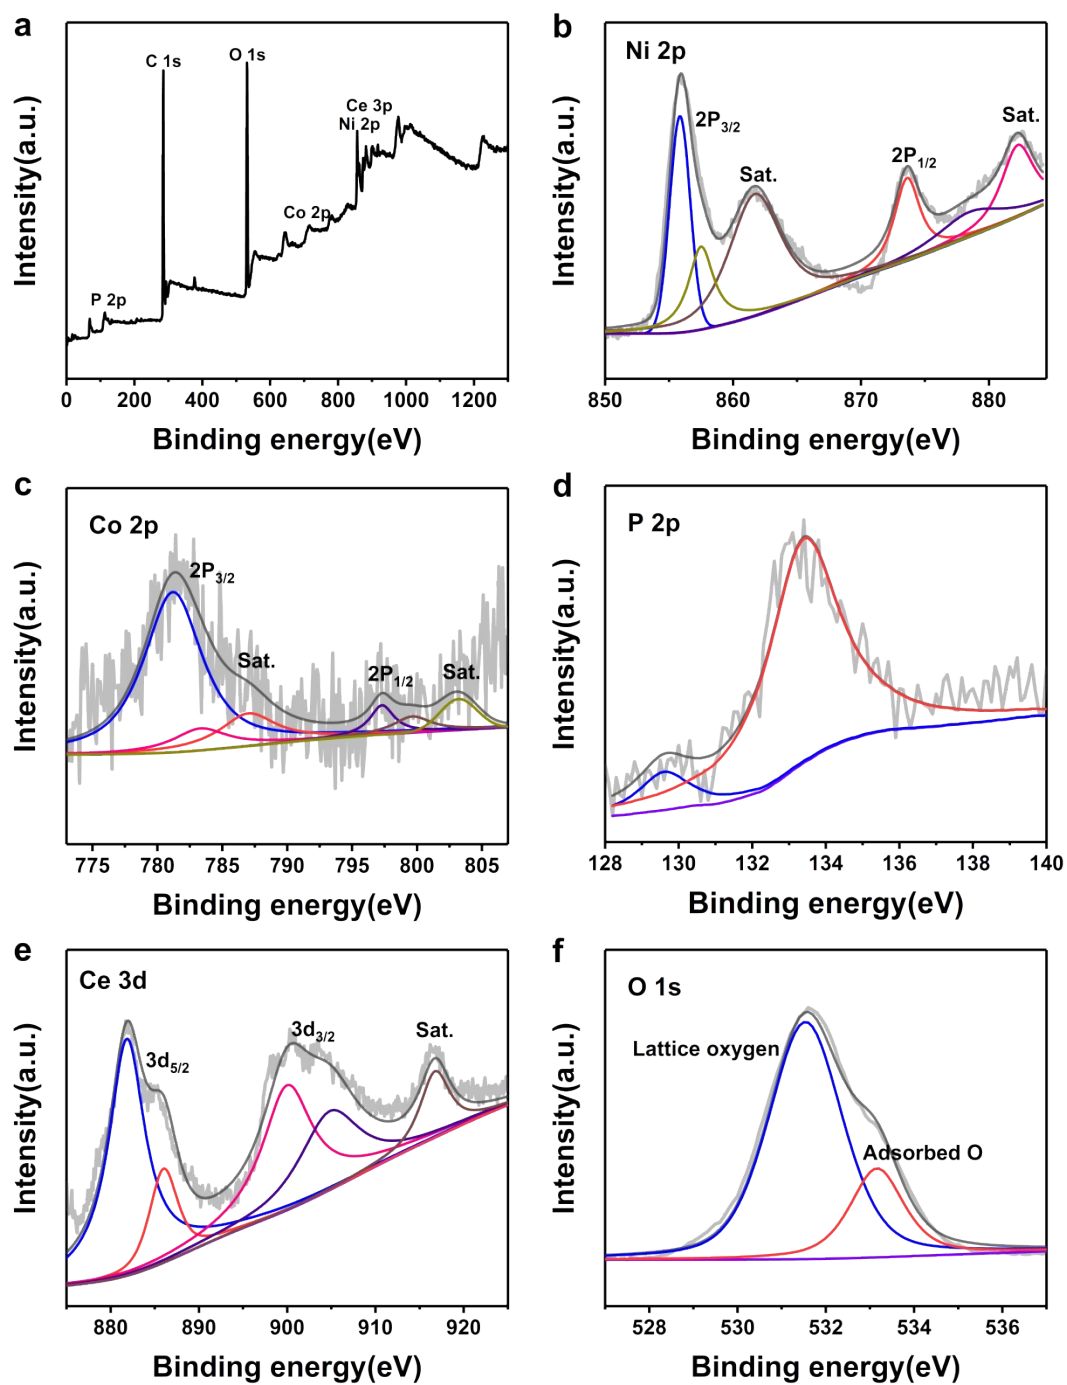

**Fig. S6** XPS survey(a), Ni 2p(b), Co 2p(c), P 2p(d), Ce 3d(e) and O 1s(f) spectra of NiCoP-CeO<sub>2</sub> after stability test.

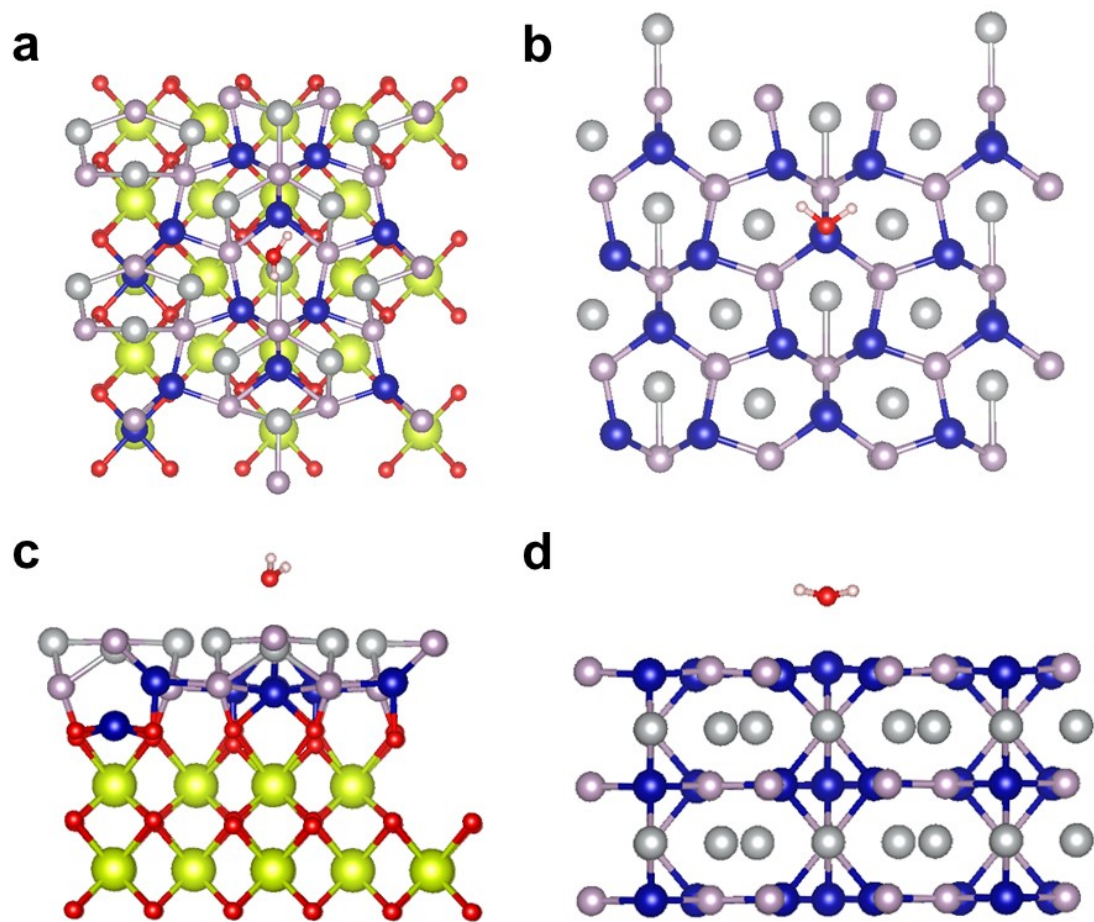

**Fig. S7** Optimized adsorption structures of NiCoP-CeO<sub>2</sub> (a) and NiCoP (b).

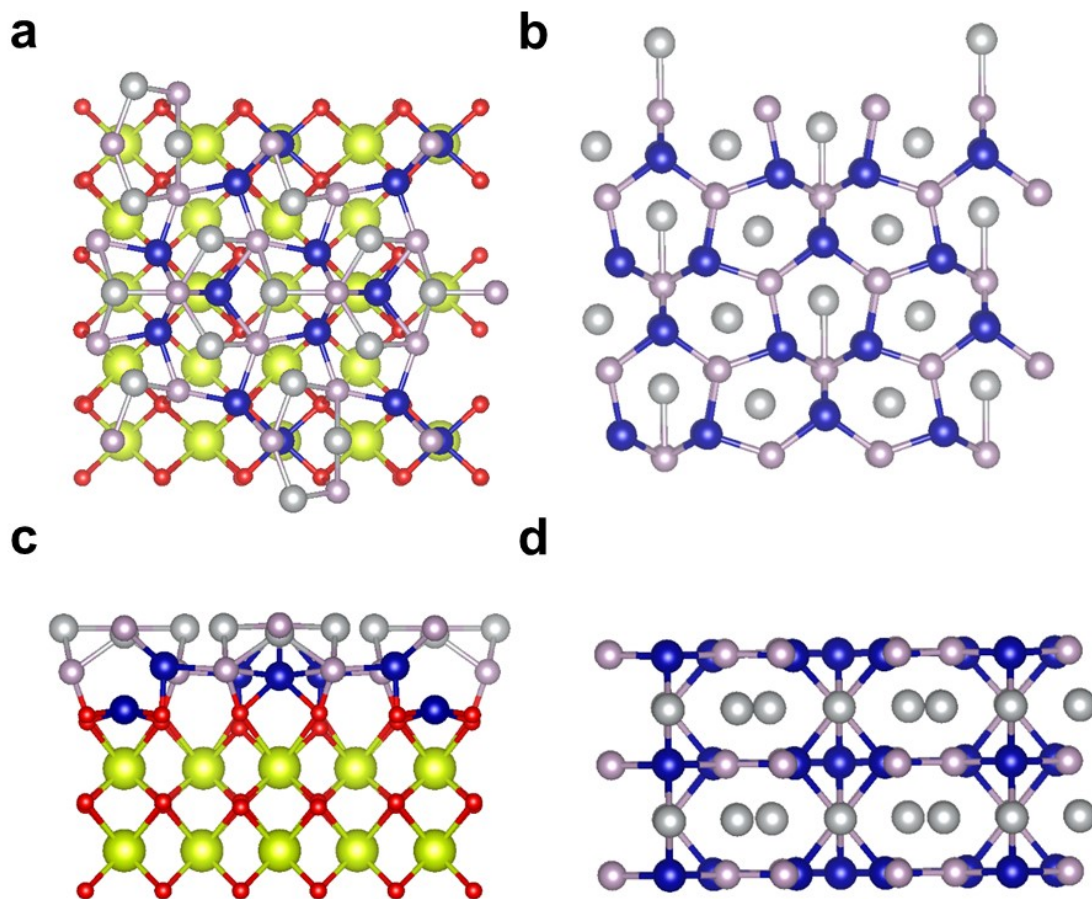

**Fig. S8** The original structures of NiCoP-CeO<sub>2</sub> (a) and NiCoP (b).

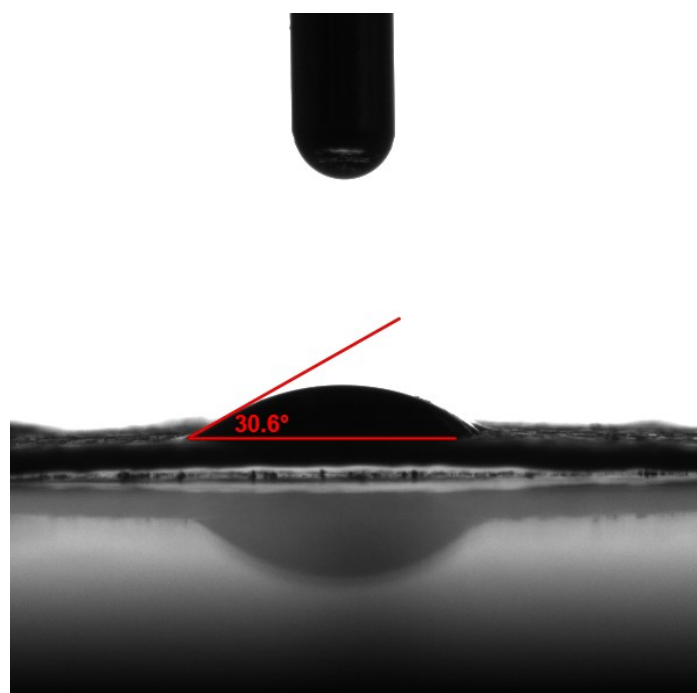

**Fig. S9** Wetting-ability testing of CeO<sub>2</sub>.

**Table S2.** The optimized cartesian coordinates of NiCoP-CeO<sub>2</sub> and NiCoP

| NiCoP-CeO <sub>2</sub> |         |         | NiCoP   |          |         |
|------------------------|---------|---------|---------|----------|---------|
| 0                      | 0       | 1.35277 | 0.49529 | 5.07893  | 1.67548 |
| 0.02303                | 2.66743 | 4.10991 | 3.30659 | 10.31073 | 1.67548 |
| 2.88952                | 0.00396 | 4.11684 | 0.47161 | 5.07885  | 5.08629 |
| 2.8113                 | 2.6159  | 1.35277 | 3.31533 | 10.28331 | 5.03904 |
| 0                      | 5.2318  | 1.35277 | 3.84608 | 3.00033  | 1.67548 |
| 0.0229                 | 7.80346 | 4.10779 | 1.03478 | 8.23213  | 1.67548 |
| 2.70454                | 5.23515 | 4.1506  | 3.83469 | 2.96915  | 5.06936 |
| 2.8113                 | 7.8477  | 1.35277 | 1.0232  | 8.21316  | 5.03776 |
| 5.6226                 | 0       | 1.35277 | 1.03478 | 1.92572  | 1.67548 |
| 5.64656                | 2.66787 | 4.13337 | 3.84608 | 7.15752  | 1.67548 |
| 8.50666                | 0.00342 | 4.11198 | 1.0181  | 1.93826  | 5.04106 |
| 8.4339                 | 2.6159  | 1.35277 | 3.84654 | 7.1773   | 5.07086 |
| 5.6226                 | 5.2318  | 1.35277 | 4.18934 | 5.07893  | 0       |
| 5.64689                | 7.80236 | 4.12983 | 1.37804 | 10.31073 | 0       |
| 8.32137                | 5.23387 | 4.13564 | 4.19638 | 5.07621  | 3.36693 |
| 8.4339                 | 7.8477  | 1.35277 | 1.39179 | 10.31077 | 3.35792 |
| 1.43936                | 1.30994 | 2.97536 | 4.24351 | 5.07085  | 6.82256 |
| 4.19188                | 3.92649 | 2.99711 | 1.44424 | 10.3079  | 6.63614 |
| 4.21695                | 1.30795 | 0       | 4.81036 | 1.20583  | 0       |
| 4.32257                | 1.26128 | 5.70197 | 1.99906 | 6.43762  | 0       |
| 1.40565                | 3.92385 | 0       | 4.7809  | 1.22486  | 3.36791 |
| 1.37954                | 3.8927  | 5.46921 | 1.97409 | 6.45061  | 3.38077 |
| 1.40565                | 1.30795 | 0       | 4.77331 | 1.21183  | 6.63074 |
| 1.39606                | 1.28222 | 5.89543 | 1.94581 | 6.47496  | 6.60677 |
| 4.21695                | 3.92385 | 0       | 1.99906 | 3.72023  | 0       |
| 4.16594                | 3.91233 | 6.04234 | 4.81036 | 8.95203  | 0       |
| 4.23963                | 1.31061 | 2.88846 | 1.96904 | 3.7029   | 3.38286 |
| 1.38719                | 3.93027 | 2.80884 | 4.78893 | 8.92288  | 3.35985 |
| 1.38494                | 6.53675 | 2.80691 | 1.93216 | 3.67373  | 6.61286 |
| 4.23884                | 9.15753 | 2.88691 | 4.78379 | 8.92613  | 6.6404  |
| 4.21695                | 6.53975 | 0       | 5.54045 | 3.33506  | 0       |
| 4.17373                | 6.55994 | 6.03274 | 2.72915 | 8.56686  | 0       |
| 1.40565                | 9.15565 | 0       | 5.47971 | 3.3314   | 3.3706  |
| 1.39705                | 9.20253 | 5.89234 | 2.67424 | 8.55772  | 3.3613  |
| 1.40565                | 6.53975 | 0       | 5.48084 | 3.25982  | 6.69606 |
| 1.3934                 | 6.59375 | 5.46542 | 2.67939 | 8.51565  | 6.75704 |
| 4.21695                | 9.15565 | 0       | 2.72915 | 1.5911   | 0       |
| 4.32511                | 9.21423 | 5.69747 | 5.54045 | 6.8229   | 0       |
| 4.19111                | 6.54119 | 2.99495 | 2.67108 | 1.59653  | 3.36251 |
| 1.4394                 | 9.15852 | 2.97404 | 5.4839  | 6.81753  | 3.36675 |
| 7.05788                | 1.31191 | 2.98255 | 2.67286 | 1.63479  | 6.75106 |
| 9.81354                | 3.9277  | 2.971   | 5.48962 | 6.87733  | 6.69424 |
| 9.83955                | 1.30795 | 0       | 2.72915 | 5.07893  | 1.67548 |



---

|          |         |         |         |          |         |
|----------|---------|---------|---------|----------|---------|
| 9.95195  | 1.25816 | 5.6714  | 5.54045 | 10.31073 | 1.67548 |
| 7.02825  | 3.92385 | 0       | 2.77637 | 5.07218  | 5.09418 |
| 6.99383  | 3.89925 | 5.49056 | 5.56405 | 10.30184 | 5.05215 |
| 7.02825  | 1.30795 | 0       | 3.85531 | 5.06169  | 8.91448 |
| 7.01515  | 1.28136 | 5.89371 | 3.25541 | 4.30172  | 9.07331 |
| 9.83955  | 3.92385 | 0       | 3.31944 | 5.86151  | 9.10425 |
| 9.78452  | 3.90493 | 5.95578 |         |          |         |
| 9.85916  | 1.30944 | 2.87771 |         |          |         |
| 7.00423  | 3.927   | 2.8137  |         |          |         |
| 7.00246  | 6.53882 | 2.81158 |         |          |         |
| 9.85845  | 9.1581  | 2.87721 |         |          |         |
| 9.83955  | 6.53975 | 0       |         |          |         |
| 9.79058  | 6.5757  | 5.95274 |         |          |         |
| 7.02825  | 9.15565 | 0       |         |          |         |
| 7.015    | 9.19806 | 5.89494 |         |          |         |
| 7.02825  | 6.53975 | 0       |         |          |         |
| 7.00755  | 6.58306 | 5.48463 |         |          |         |
| 9.83955  | 9.15565 | 0       |         |          |         |
| 9.95457  | 9.2201  | 5.67129 |         |          |         |
| 9.81292  | 6.53999 | 2.9704  |         |          |         |
| 7.05851  | 9.15553 | 2.98083 |         |          |         |
| 4.89192  | 5.06049 | 10.9447 |         |          |         |
| 1.92742  | 0.00981 | 8.61797 |         |          |         |
| 10.92348 | 5.25766 | 8.67953 |         |          |         |
| 3.01019  | 3.31994 | 8.83502 |         |          |         |
| 0.38039  | 8.41719 | 8.80759 |         |          |         |
| 0.3809   | 2.07036 | 8.80809 |         |          |         |
| 3.03003  | 7.16858 | 8.83196 |         |          |         |
| 7.5936   | 0.00852 | 8.60129 |         |          |         |
| 5.36187  | 5.274   | 8.86023 |         |          |         |
| 8.72577  | 3.34305 | 8.82861 |         |          |         |
| 6.02457  | 8.42635 | 8.80319 |         |          |         |
| 6.0294   | 2.04678 | 8.79841 |         |          |         |
| 8.72866  | 7.13126 | 8.82957 |         |          |         |
| 11.21949 | 0.0087  | 6.05078 |         |          |         |
| 3.37733  | 5.23954 | 7.276   |         |          |         |
| 4.01392  | 1.35168 | 7.56515 |         |          |         |
| 1.2307   | 6.62314 | 7.26885 |         |          |         |
| 1.22699  | 3.8687  | 7.27464 |         |          |         |
| 4.0168   | 9.12598 | 7.5596  |         |          |         |
| 5.58773  | 0.00623 | 6.07427 |         |          |         |
| 8.97638  | 5.24346 | 7.17657 |         |          |         |
| 9.64897  | 1.35377 | 7.5303  |         |          |         |
| 6.86323  | 6.61179 | 7.2981  |         |          |         |

---

|          |         |          |
|----------|---------|----------|
| 6.8567   | 3.87215 | 7.30716  |
| 9.64621  | 9.13019 | 7.52972  |
| 10.36712 | 3.44862 | 7.41042  |
| 1.94795  | 8.69486 | 7.34877  |
| 1.94645  | 1.79325 | 7.35101  |
| 10.36906 | 7.04267 | 7.40529  |
| 10.87765 | 0.01125 | 8.83688  |
| 1.89288  | 5.25345 | 8.97673  |
| 4.74549  | 3.46005 | 7.50141  |
| 7.58383  | 8.67942 | 7.34024  |
| 7.58401  | 1.80128 | 7.33733  |
| 4.75034  | 7.02393 | 7.48714  |
| 5.28314  | 0.0064  | 8.83368  |
| 7.60187  | 5.23894 | 8.95171  |
| 4.14623  | 5.57168 | 11.31531 |
| 5.61206  | 5.10058 | 11.60368 |

**Table S3.** The original cartesian coordinates of NiCoP-CeO<sub>2</sub> and NiCoP

| NiCoP-CeO <sub>2</sub> |          |         | NiCoP   |          |         |
|------------------------|----------|---------|---------|----------|---------|
| 0                      | 0        | 1.35277 | 0.49529 | 5.07893  | 1.67548 |
| 0.03431                | 2.66848  | 4.12059 | 3.30659 | 10.31073 | 1.67548 |
| 2.90239                | 2.93E-04 | 4.1163  | 0.51711 | 5.07893  | 5.07034 |
| 2.8113                 | 2.6159   | 1.35277 | 3.32841 | 10.31073 | 5.07034 |
| 0                      | 5.2318   | 1.35277 | 3.84608 | 3.00033  | 1.67548 |
| 0.03607                | 7.79476  | 4.12049 | 1.03478 | 8.23213  | 1.67548 |
| 2.71648                | 5.23215  | 4.14039 | 3.85081 | 2.9635   | 5.0495  |
| 2.8113                 | 7.8477   | 1.35277 | 1.03951 | 8.1953   | 5.0495  |
| 5.6226                 | 0        | 1.35277 | 1.03478 | 1.92572  | 1.67548 |
| 5.65684                | 2.66835  | 4.1204  | 3.84608 | 7.15752  | 1.67548 |
| 8.52526                | 4.19E-04 | 4.11556 | 1.03951 | 1.96255  | 5.0495  |
| 8.4339                 | 2.6159   | 1.35277 | 3.85081 | 7.19435  | 5.0495  |
| 5.6226                 | 5.2318   | 1.35277 | 4.18934 | 5.07893  | 0       |
| 5.65813                | 7.7947   | 4.11969 | 1.37804 | 10.31073 | 0       |
| 8.33865                | 5.23224  | 4.14052 | 4.21375 | 5.07893  | 3.36596 |
| 8.4339                 | 7.8477   | 1.35277 | 1.40245 | 10.31073 | 3.36596 |
| 1.44418                | 1.30832  | 2.99617 | 4.24186 | 5.07893  | 6.65575 |
| 4.20013                | 3.92466  | 2.98001 | 1.43056 | 10.31073 | 6.65575 |
| 4.21695                | 1.30795  | 0       | 4.81036 | 1.20583  | 0       |
| 4.34271                | 1.24827  | 5.6815  | 1.99906 | 6.43762  | 0       |
| 1.40565                | 3.92385  | 0       | 4.79816 | 1.22414  | 3.36686 |
| 1.41549                | 3.88011  | 5.47558 | 1.98686 | 6.45583  | 3.36686 |
| 1.40565                | 1.30795  | 0       | 4.80198 | 1.24067  | 6.63827 |

|          |          |         |         |          |         |
|----------|----------|---------|---------|----------|---------|
| 1.41296  | 1.26502  | 5.91852 | 1.99068 | 6.47247  | 6.63827 |
| 4.21695  | 3.92385  | 0       | 1.99906 | 3.72023  | 0       |
| 4.19986  | 3.89717  | 5.98113 | 4.81036 | 8.95203  | 0       |
| 4.24584  | 1.31021  | 2.88857 | 1.98686 | 3.70192  | 3.36686 |
| 1.38916  | 3.92882  | 2.80896 | 4.79816 | 8.93372  | 3.36686 |
| 1.39029  | 6.53486  | 2.81443 | 1.99068 | 3.68538  | 6.63827 |
| 4.24668  | 9.15426  | 2.88184 | 4.80198 | 8.91718  | 6.63827 |
| 4.21695  | 6.53975  | 0       | 5.54045 | 3.33506  | 0       |
| 4.2003   | 6.56623  | 5.9817  | 2.72915 | 8.56686  | 0       |
| 1.40565  | 9.15565  | 0       | 5.49564 | 3.33255  | 3.3579  |
| 1.41295  | 9.19826  | 5.91724 | 2.68434 | 8.56435  | 3.3579  |
| 1.40565  | 6.53975  | 0       | 5.50245 | 3.30597  | 6.71691 |
| 1.41607  | 6.58348  | 5.47734 | 2.69115 | 8.53777  | 6.71691 |
| 4.21695  | 9.15565  | 0       | 2.72915 | 1.5911   | 0       |
| 4.34306  | 9.21506  | 5.67932 | 5.54045 | 6.8229   | 0       |
| 4.20136  | 6.5388   | 2.98603 | 2.68434 | 1.59361  | 3.3579  |
| 1.44546  | 9.15492  | 2.98794 | 5.49564 | 6.82541  | 3.3579  |
| 7.06692  | 1.30849  | 2.99519 | 2.69115 | 1.62018  | 6.71691 |
| 9.82236  | 3.92471  | 2.98071 | 5.50245 | 6.85198  | 6.71691 |
| 9.83955  | 1.30795  | 0       | 2.72915 | 5.07893  | 1.67548 |
| 9.96534  | 1.24843  | 5.68037 | 5.54045 | 10.31073 | 1.67548 |
| 7.02825  | 3.92385  | 0       | 2.76452 | 5.07893  | 5.06071 |
| 7.03797  | 3.8802   | 5.47508 | 5.57582 | 10.31073 | 5.06071 |
| 7.02825  | 1.30795  | 0       |         |          |         |
| 7.03554  | 1.26512  | 5.91814 |         |          |         |
| 9.83955  | 3.92385  | 0       |         |          |         |
| 9.82272  | 3.89711  | 5.98155 |         |          |         |
| 9.86871  | 1.30997  | 2.88783 |         |          |         |
| 7.01122  | 3.92901  | 2.8093  |         |          |         |
| 7.01303  | 6.53524  | 2.81412 |         |          |         |
| 9.86961  | 9.15393  | 2.8818  |         |          |         |
| 9.83955  | 6.53975  | 0       |         |          |         |
| 9.82303  | 6.56632  | 5.9823  |         |          |         |
| 7.02825  | 9.15565  | 0       |         |          |         |
| 7.03551  | 9.19846  | 5.9172  |         |          |         |
| 7.02825  | 6.53975  | 0       |         |          |         |
| 7.03819  | 6.58364  | 5.4769  |         |          |         |
| 9.83955  | 9.15565  | 0       |         |          |         |
| 9.96549  | 9.21533  | 5.67942 |         |          |         |
| 9.82402  | 6.53868  | 2.98781 |         |          |         |
| 7.06761  | 9.1551   | 2.98798 |         |          |         |
| 2.0062   | 10.46274 | 8.63497 |         |          |         |
| 10.99854 | 5.2313   | 8.68815 |         |          |         |
| 3.12567  | 3.34735  | 8.8416  |         |          |         |

|          |          |         |
|----------|----------|---------|
| 0.42986  | 8.42027  | 8.81849 |
| 0.43058  | 2.04307  | 8.81939 |
| 3.1253   | 7.11605  | 8.84164 |
| 7.62889  | 2.72E-04 | 8.63513 |
| 5.37644  | 5.23167  | 8.68815 |
| 8.74802  | 3.34723  | 8.84135 |
| 6.05258  | 8.42031  | 8.81886 |
| 6.05325  | 2.04364  | 8.81899 |
| 8.74763  | 7.11613  | 8.84149 |
| 11.22993 | 5.23E-05 | 6.08561 |
| 3.41231  | 5.23165  | 7.21577 |
| 4.06001  | 1.34773  | 7.55126 |
| 1.27942  | 6.62797  | 7.28344 |
| 1.27965  | 3.83575  | 7.28188 |
| 4.06026  | 9.11575  | 7.54904 |
| 5.60762  | 10.46344 | 6.08615 |
| 9.03405  | 5.23174  | 7.21542 |
| 9.68297  | 1.34809  | 7.55015 |
| 6.90201  | 6.62829  | 7.283   |
| 6.90253  | 3.836    | 7.28178 |
| 9.68235  | 9.1161   | 7.54933 |
| 10.4118  | 3.43171  | 7.4306  |
| 1.99293  | 8.68828  | 7.35986 |
| 1.99301  | 1.77462  | 7.36093 |
| 10.41139 | 7.03201  | 7.4311  |
| 10.92284 | 10.4635  | 8.82934 |
| 1.97174  | 5.2314   | 8.92816 |
| 4.78921  | 3.43166  | 7.43049 |
| 7.61537  | 8.6889   | 7.35994 |
| 7.61568  | 1.77515  | 7.36038 |
| 4.78897  | 7.03186  | 7.43108 |
| 5.30021  | 2.09E-05 | 8.82978 |
| 7.59451  | 5.2314   | 8.92818 |

---

## References

1. B. Wang, P. Xi, C. Shan, H. Chen, H. Xu, K. Iqbal, W. Liu and Y. Tang, *Advanced Materials Interfaces*, 2017, **4**, 1700272.
2. Q. Dong, C. Shuai, Z. Mo, N. Liu, G. Liu, J. Wang, H. Pei, Q. Jia, W. Liu and X. Guo, *Journal of Solid State Chemistry*, 2021, **296**, 121967.
3. Y. Hu, W. Liu, K. Jiang, L. Xu, M. Guan, J. Bao, H. Ji and H. Li, *Inorganic Chemistry Frontiers*, 2020, **7**, 4461-4468.
4. Y. Li, W. Luo, D. Wu, Q. Wang, J. Yin, P. Xi, Y. Qu, M. Gu, X. Zhang, Z. Lu and Z. Zheng, *Nano Research*, 2021.
5. X. Long, H. Lin, D. Zhou, Y. An and S. Yang, *ACS Energy Letters*, 2018, **3**, 290-296.
6. X. Wang, Y. Yang, L. Diao, Y. Tang, F. He, E. Liu, C. He, C. Shi, J. Li, J. Sha, S. Ji, P. Zhang, L. Ma and N. Zhao, *ACS Applied Material Interfaces*, 2018, **10**, 35145-35153.
7. E. Cossar, K. Agarwal, V. B. Nguyen, R. Safari, G. A. Botton and E. A. Baranova, *Electrocatalysis*, 2021, **12**, 605–618.
